# Supplementary material
Source: PubMed Central journal article supplement (PMC7482384)
Supplement: MILQ-98-847-s001.pdf [file MILQ-98-847-s001.pdf]

**Appendix Table 1.** Number of Qualifying Services Received and Number of TINs “Competing” for Assignment, by Decile of Per-beneficiary Spending<sup>a</sup>

| Decile of Spending | CMS Attribution Algorithm                                  |                                                   | Attribution Based Only on Office Visits With PCPs          |                                                   |
|--------------------|------------------------------------------------------------|---------------------------------------------------|------------------------------------------------------------|---------------------------------------------------|
|                    | Mean Number of Qualifying Services Received by Beneficiary | Mean Number of TINs Providing Qualifying Services | Mean Number of Qualifying Services Received by Beneficiary | Mean Number of TINs Providing Qualifying Services |
| 1 (lowest)         | 2.24                                                       | 1.07                                              | 2.21                                                       | 1.06                                              |
| 2                  | 3.39                                                       | 1.12                                              | 3.30                                                       | 1.12                                              |
| 3                  | 4.05                                                       | 1.16                                              | 3.92                                                       | 1.16                                              |
| 4                  | 4.58                                                       | 1.20                                              | 4.40                                                       | 1.19                                              |
| 5                  | 5.08                                                       | 1.24                                              | 4.86                                                       | 1.23                                              |
| 6                  | 5.57                                                       | 1.27                                              | 5.33                                                       | 1.26                                              |
| 7                  | 6.16                                                       | 1.31                                              | 5.83                                                       | 1.30                                              |
| 8                  | 6.76                                                       | 1.36                                              | 6.41                                                       | 1.33                                              |
| 9                  | 7.23                                                       | 1.44                                              | 6.59                                                       | 1.36                                              |
| 10 (highest)       | 9.20                                                       | 1.68                                              | 6.53                                                       | 1.37                                              |

Abbreviations: CMS, Centers for Medicare and Medicaid Services; PCP, primary care physician; TIN, tax identification number.

<sup>a</sup> Based on 2011 Medicare claims data.

**Appendix Table 2.** Falsification Tests of 439 Non-ACO TINs Large Enough to Participate in the MSSP, and of 2015 MSSP Entrants Prior to Entry

| Hypothetical Entry Year   | Differential Change in Spending in Hypothetical Performance Year, \$/patient |      |      |
|---------------------------|------------------------------------------------------------------------------|------|------|
|                           | 2013                                                                         | 2014 | 2015 |
| <b>Large non-ACO TINs</b> |                                                                              |      |      |
| 2012                      | 14                                                                           | 3    | 12   |
| 2013                      | 13                                                                           | 2    | 11   |
| 2014                      | -                                                                            | -1   | 8    |
| <b>2015 MSSP entrants</b> |                                                                              |      |      |
| 2012                      | 143**                                                                        | 93   | -    |
| 2013                      | 115**                                                                        | 65   | -    |
| 2014                      | -                                                                            | 39   | -    |

Abbreviations: ACO, accountable care organization; MSSP, Medicare Shared Savings Program; TIN, tax identification number.

\*  $p < 0.05$ , \*\*  $p < 0.01$ , \*\*\*  $p < 0.001$ .

**Appendix Table 3.** Gross Savings Estimates by ACO Type With and Without Adjustment for Non-ACO TIN/CCN Fixed Effects in Addition to ACO Fixed Effects<sup>a</sup>

| Entry Cohort | 2015 Savings: Physician Group ACOs, \$ |                                          | 2015 Savings: Hospital-Based ACOs, \$/Beneficiary |                                          |
|--------------|----------------------------------------|------------------------------------------|---------------------------------------------------|------------------------------------------|
|              | ACO Fixed Effects Only<br>(95% CI)     | ACO and non-ACO<br>TIN/CCN Fixed Effects | ACO Fixed Effects Only<br>(95% CI)                | ACO and non-ACO<br>TIN/CCN Fixed Effects |
| 2012         | -474<br>(-737, -212)                   | -381                                     | -169<br>(-286, -52)                               | -82                                      |
| 2013         | -342<br>(-494, -190)                   | -277                                     | -18<br>(-144, 109)                                | 75                                       |
| 2014         | -156<br>(-272, -40)                    | -183                                     | 88<br>(-28, 204)                                  | 143                                      |

Abbreviations: ACO, accountable care organization; CCN, Centers for Medicare and Medicaid Services (CMS) Certification Number; CI, confidence interval; TIN, tax identification number.

<sup>a</sup>The computing environment did not support estimation of robust standard errors in models with thousands of TIN/CCN fixed effects. Therefore, 95% confidence intervals are not reported for point estimates adjusted for non-ACO fixed effects.

**Appendix Table 4.** Application of Baseline Assignment Approach in Falsification Tests Treating Large Non-ACO TINs or 2015 MSSP Entrants as Hypothetical Entrants in 2013

| Hypothetical Treatment Group   | Preperiod (2009-2012) Difference in Spending vs. Control Group, \$/patient | Differential Change in Spending After Hypothetical Entry in 2013, \$/Patient (Inflated Estimate) |               |               |
|--------------------------------|----------------------------------------------------------------------------|--------------------------------------------------------------------------------------------------|---------------|---------------|
|                                |                                                                            | 2013                                                                                             | 2014          | 2015          |
| Large non-ACO TINs             | 39*                                                                        | -3<br>(-5)                                                                                       | 99**<br>(174) | 80**<br>(150) |
| 2015 MSSP entry cohort of ACOs | 35                                                                         | 114**<br>(186)                                                                                   | 23<br>(40)    | —             |

Abbreviations: ACO, accountable care organization; MSSP, Medicare Shared Savings Program; TIN, tax identification number.

\*  $p < 0.05$ , \*\*  $p < 0.01$ , \*\*\*  $p < 0.001$

**Appendix Table 5.** Attribution Based on Referring PCP When Beneficiary Has No Office Visits With a PCP

| Entry Cohort | Unadjusted Preentry Sample Mean, <sup>a</sup> \$/Patient | Adjusted Pre-entry Difference in Annual Spending Level Between ACOs and Control Group, \$/Patient (95% CI) | Adjusted Pre-entry Difference in Annual Spending Trend Between ACOs and Control Group, \$/Patient (95% CI) | Estimated Gross Savings (Adjusted Differential Change in Spending From Pre-Entry Period to Performance Year for ACOs vs. Control Group), <sup>b</sup> \$/Patient (95% CI) |                      |                      |
|--------------|----------------------------------------------------------|------------------------------------------------------------------------------------------------------------|------------------------------------------------------------------------------------------------------------|---------------------------------------------------------------------------------------------------------------------------------------------------------------------------|----------------------|----------------------|
|              |                                                          |                                                                                                            |                                                                                                            | 2013                                                                                                                                                                      | 2014                 | 2015                 |
| 2012         | 10,390                                                   | 289<br>(63, 515)                                                                                           | -25<br>(-78, 28)                                                                                           | -191<br>(-329, -53)                                                                                                                                                       | -356<br>(-492, -219) | -408<br>(-561, -254) |
| 2013         | 10,390                                                   | 217<br>(58, 377)                                                                                           | -23<br>(-65, 18)                                                                                           | -37<br>(-141, 68)                                                                                                                                                         | -147<br>(-251, -44)  | -251<br>(-356, -145) |
| 2014         | 10,390                                                   | 160<br>(10, 310)                                                                                           | 8<br>(-21, 37)                                                                                             | —                                                                                                                                                                         | -94<br>(-171, -16)   | -86<br>(-179, 7)     |

Abbreviations: ACOs, accountable care organizations; CI, confidence interval; PCP, primary care physician.

**Appendix Table 6.** Tests of ACO Gaming of CMS Attribution Algorithm via Manipulation of TINs Used for Billing

| Entry Cohort | Estimated Gross Savings in 2015 Using CMS Attribution Algorithm<br>(Differential Change in Spending From Pre-entry Period to 2015 for ACOs vs. Control Group), \$/Patient<br>(95% CI) |                                      |                                              |
|--------------|---------------------------------------------------------------------------------------------------------------------------------------------------------------------------------------|--------------------------------------|----------------------------------------------|
|              | ACOs Defined as Fixed Sets of TINs Over Time <sup>a</sup>                                                                                                                             |                                      | ACOs Defined as Fixed Sets of NPIs Over Time |
|              | Unadjusted for Patient Characteristics                                                                                                                                                | Adjusted for Patient Characteristics | Adjusted for Patient Characteristics         |
| 2012         | -465<br>(-665, -266)                                                                                                                                                                  | -438<br>(-588, -289)                 | -364<br>(-495, -233)                         |
| 2013         | -179<br>(-383, 26)                                                                                                                                                                    | -238<br>(-385, -91)                  | -130<br>(-263, 2)                            |
| 2014         | -57<br>(-234, 121)                                                                                                                                                                    | -42<br>(-170, 87)                    | 21<br>(-96, 138)                             |

Abbreviations: ACO, accountable care organization; NPI, National Provider Identifier; TIN, tax identification number.

<sup>a</sup>As reported in Appendix Table 7, use of the CMS attribution algorithm induced significant differences in preperiod trends when ACOs were defined as fixed sets of TINs, with spending declining for ACOs relative to the control group. Thus, these estimates are likely biased away from the null. The differences in preperiod trends were minimized when ACOs were defined as fixed sets of NPIs instead; thus, the results in the rightmost column are less subject to this bias. Differences between the estimates therefore cannot be interpreted as the result of manipulation of the TINs used for billing.

**Appendix Table 7.** Comparison of Preperiod Differences in Spending Levels and Trends by Different Methods of Patient Attribution

|                                                                                                         | <b>Unadjusted<br/>Pre-entry<br/>Sample<br/>Mean<br/>\$/Patient</b> | <b>Adjusted Pre-entry<br/>Difference in Annual<br/>Spending <i>Level</i><br/>Between ACOs and<br/>Control Group,<br/>\$/Patient<br/>(95% CI)</b> | <b>Adjusted Pre-entry<br/>Difference in Annual<br/>Spending <i>Trend</i><br/>Between ACOs and<br/>Control Group,<br/>\$/Patient<br/>(95% CI)</b> |
|---------------------------------------------------------------------------------------------------------|--------------------------------------------------------------------|--------------------------------------------------------------------------------------------------------------------------------------------------|--------------------------------------------------------------------------------------------------------------------------------------------------|
| <b>Attribution Based on PCP Office Visits</b>                                                           |                                                                    |                                                                                                                                                  |                                                                                                                                                  |
| 2012 cohort                                                                                             | 9649                                                               | 139<br>(-79, 357)                                                                                                                                | -3<br>(-58, 53)                                                                                                                                  |
| 2013 cohort                                                                                             | 9649                                                               | 31<br>(-84, 146)                                                                                                                                 | -5<br>(-39, 29)                                                                                                                                  |
| 2014 cohort                                                                                             | 9649                                                               | 33<br>(-90, 155)                                                                                                                                 | 8<br>(-18, 34)                                                                                                                                   |
| <b>Attribution Based on PCP Office Visits or Office Visits With Specialists if No Visits With a PCP</b> |                                                                    |                                                                                                                                                  |                                                                                                                                                  |
| 2012 cohort                                                                                             | 9778                                                               | 188<br>(-20, 396)                                                                                                                                | -6<br>(-60, 47)                                                                                                                                  |
| 2013 cohort                                                                                             | 9778                                                               | 92<br>(-23, 206)                                                                                                                                 | -1<br>(-35, 33)                                                                                                                                  |
| 2014 cohort                                                                                             | 9778                                                               | 95<br>(-38, 228)                                                                                                                                 | 6<br>(-19, 30)                                                                                                                                   |
| <b>CMS Attribution Algorithm</b>                                                                        |                                                                    |                                                                                                                                                  |                                                                                                                                                  |
| 2012 cohort                                                                                             | 10,038                                                             | 98<br>(-51, 247)                                                                                                                                 | -74<br>(-138, -10)                                                                                                                               |
| 2013 cohort                                                                                             | 10,038                                                             | 78<br>(-127, 282)                                                                                                                                | -64<br>(-112, -16)                                                                                                                               |
| 2014 cohort                                                                                             | 10,038                                                             | -65<br>(-227, 97)                                                                                                                                | 14<br>(-27, 55)                                                                                                                                  |

Abbreviations: Abbreviations: ACOs, accountable care organizations; CI, confidence interval; CMS, Centers for Medicare and Medicaid Services; PCP, primary care physician

**Appendix Figure 1.** Falsification Tests Estimating Differential Changes in Spending for ACOs Hypothetically Entering in Pre-entry Period Years<sup>a</sup>

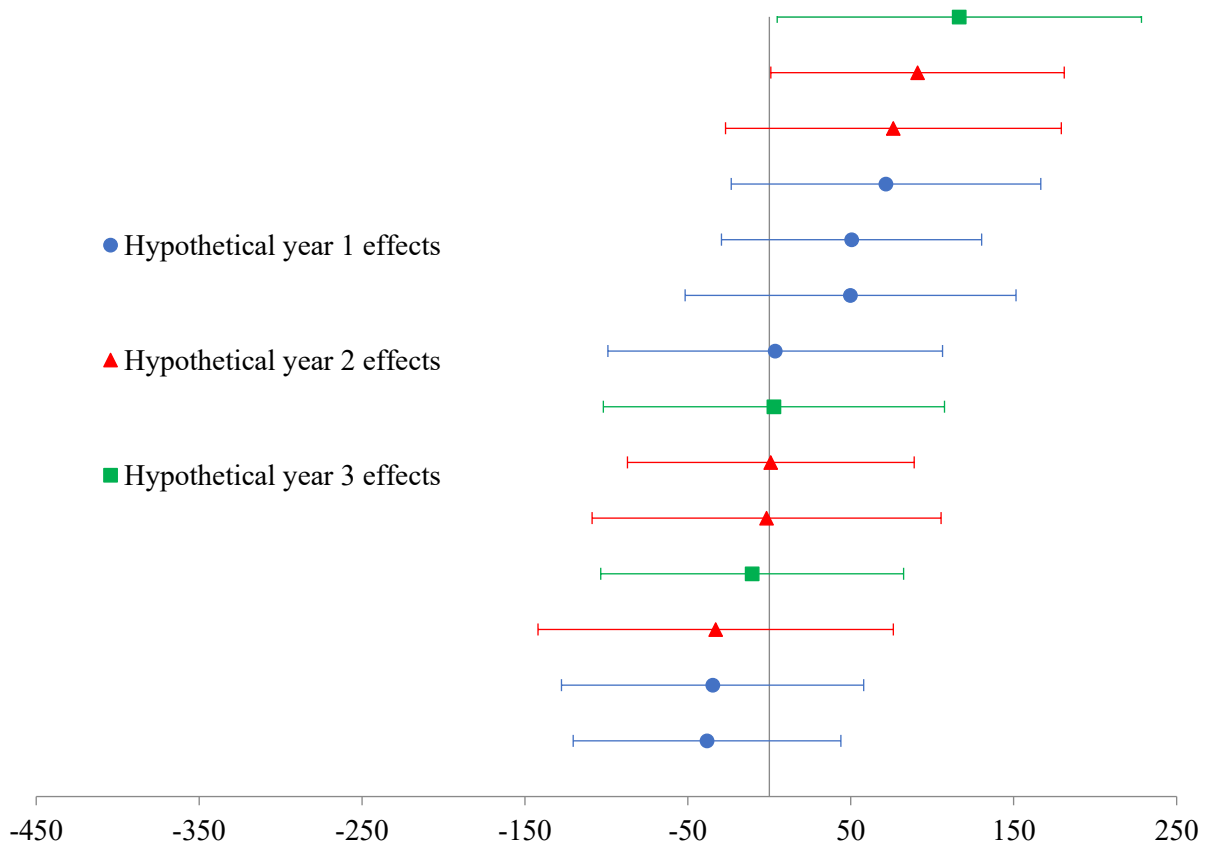

<sup>a</sup>For each entry cohort of ACOs, we estimated all possible differential changes in pre-entry spending generated by treating each pre-entry year as a hypothetical entry year. For the 2013 entry cohort, for example, this allowed procedure generated 3 hypothetical effects of 1 year of participation (differential changes from 2009 to 2010, from 2009-2010 to 2011, and from 2009-2011 to 2012); 2 hypothetical year 2 effects (differential changes from 2009 to 2011 and from 2009-2010 to 2012); and 1 hypothetical year 3 effect (differential change from 2009 to 2012). Plotted are all the possible hypothetical effects across the 2012-2014 entry cohorts. The estimates were distributed evenly around zero, with a slight skew toward positive differential changes rather than negative differential changes. Moreover, hypothetical year 2 effects were not systematically more negative than hypothetical year 1 effects, and hypothetical year 3 effects were not systematically more negative than hypothetical year 1 or 2 effects.
